# Supplementary material
Source: MDPI journal article supplement (https://www.mdpi.com/2077-1312/10/3/335)
Supplement: s1 [file s1]

Archive with 2 entries (2 files):
- DohnerDuVal_JMSE2022_Supplementary S1.pdf
- DohnerDuVal_JMSE2022_Supplementary S2.pdf
